# Supplementary material
Source: publisher figshare collection journal article supplement (https://diabetesjournals.figshare.com/articles/dataset/_/13177016)

Figure S1

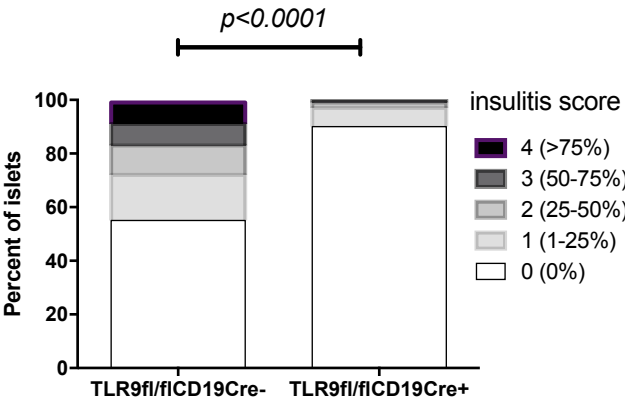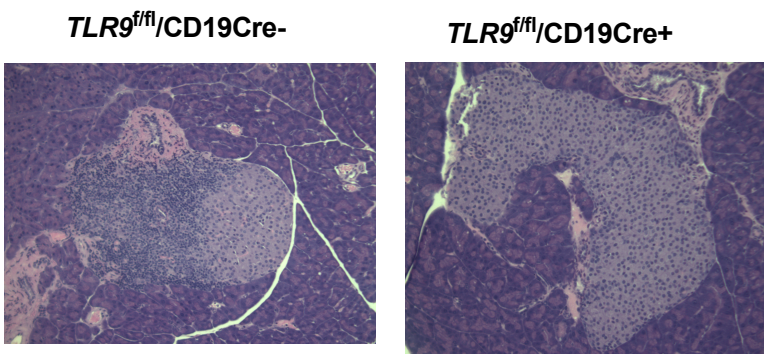

Figure S2

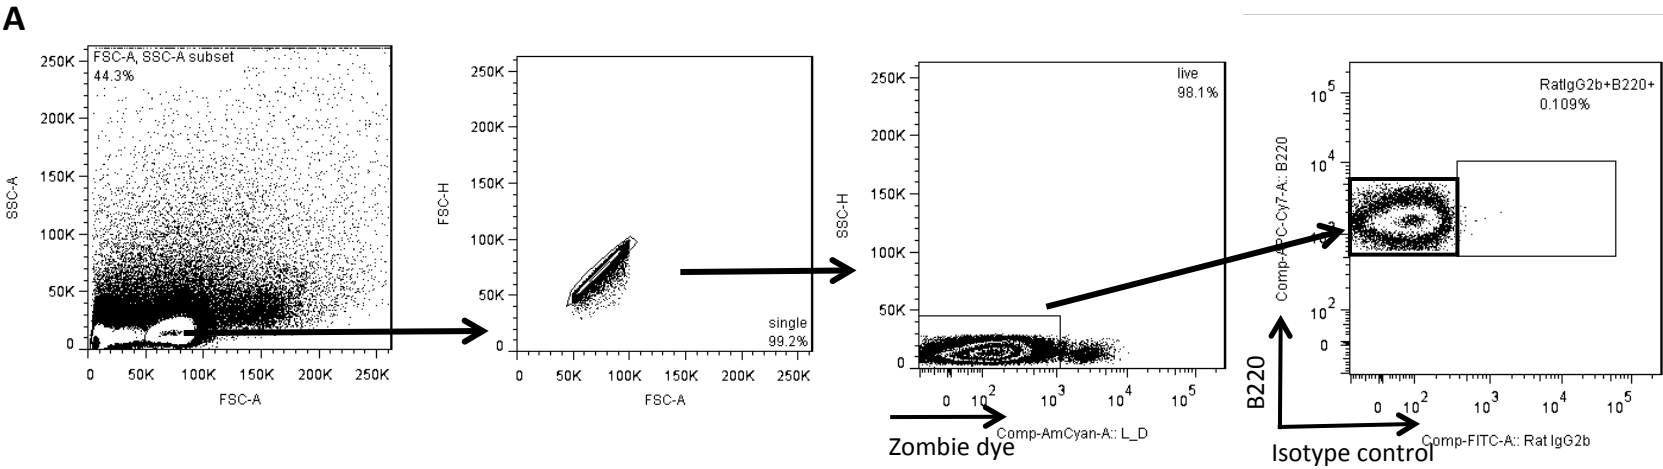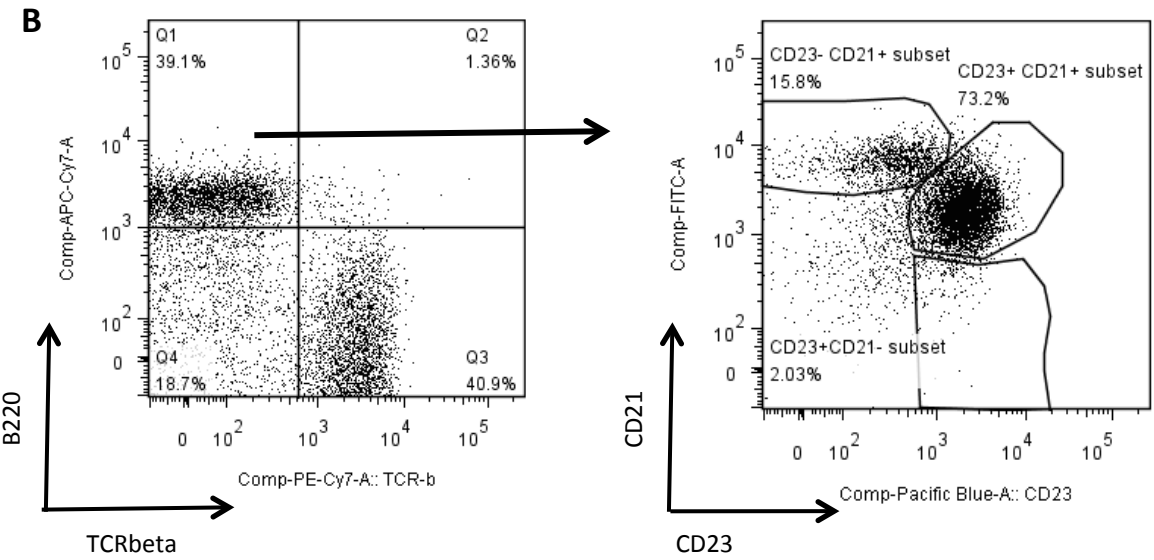

Figure S3

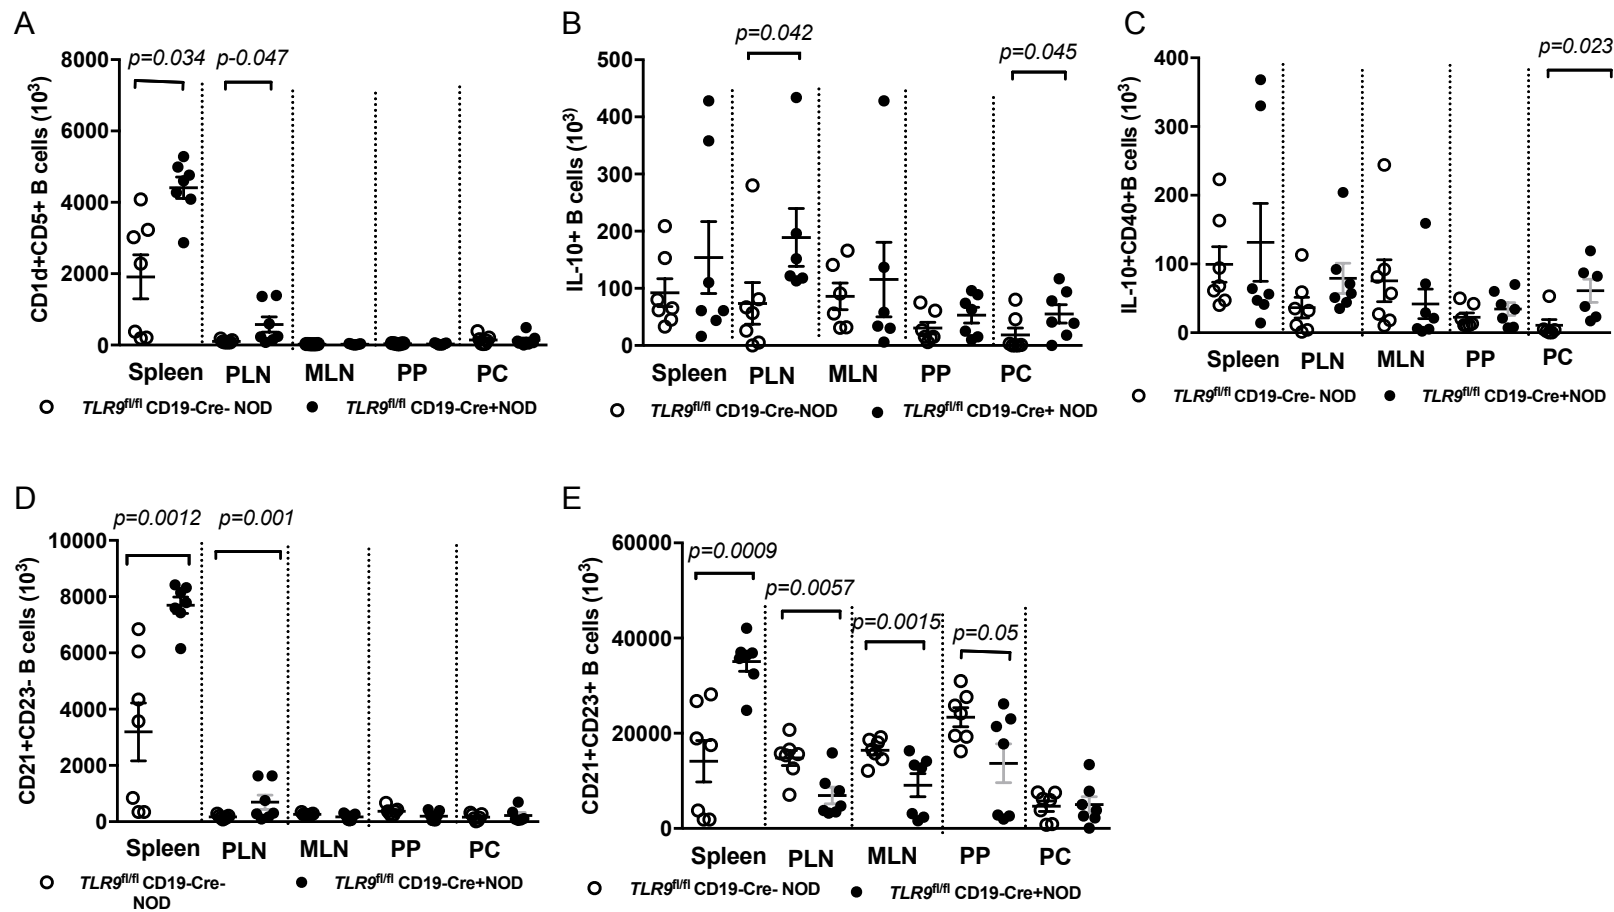

Figure S4

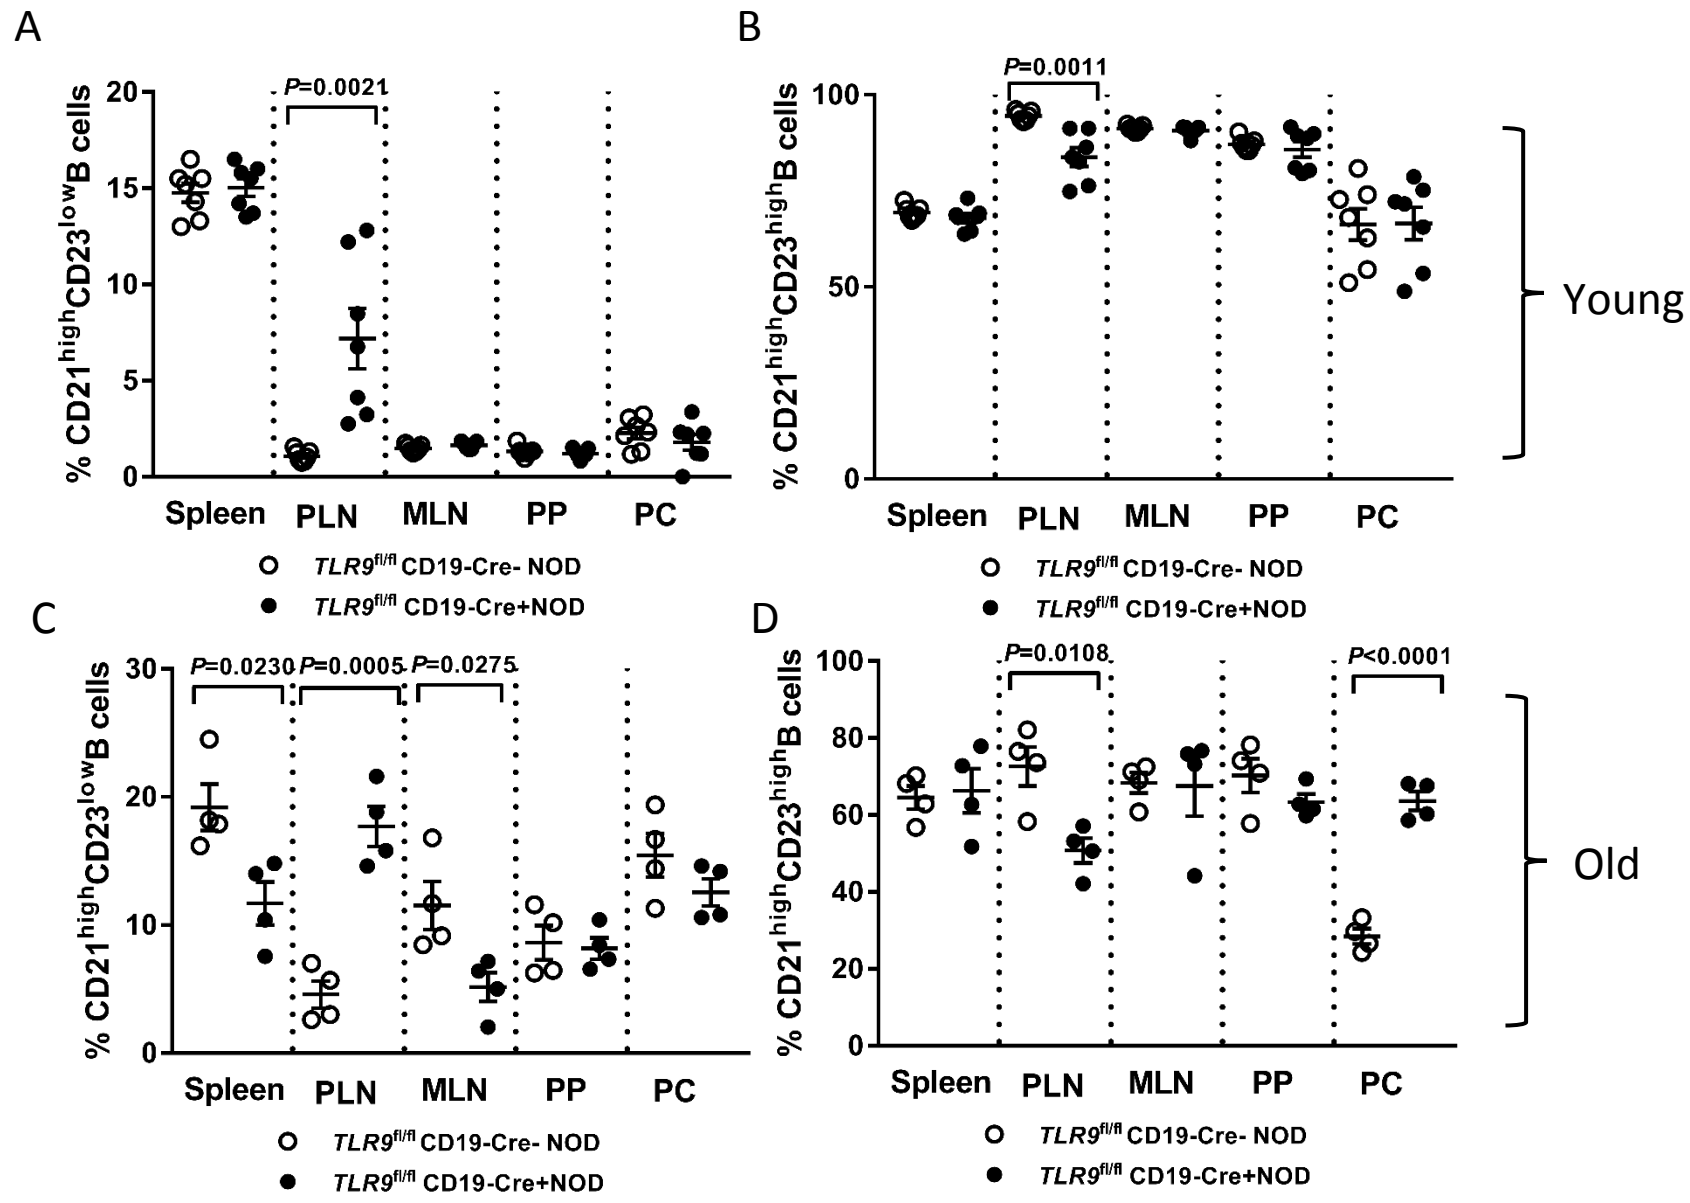

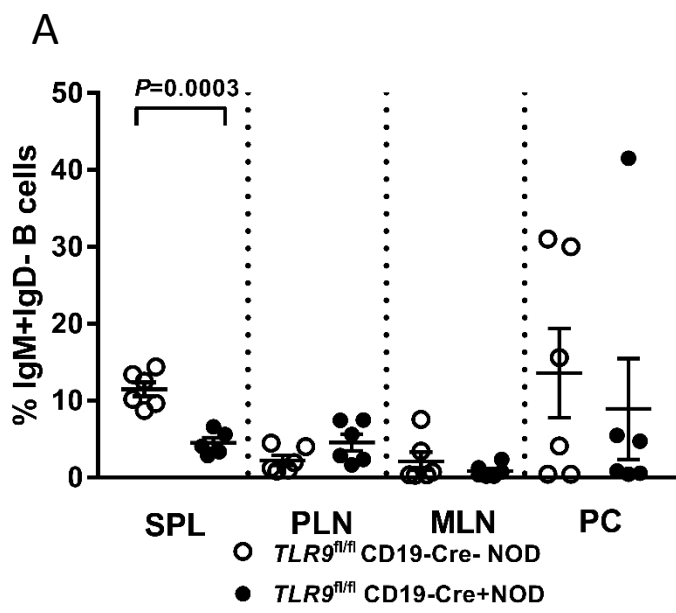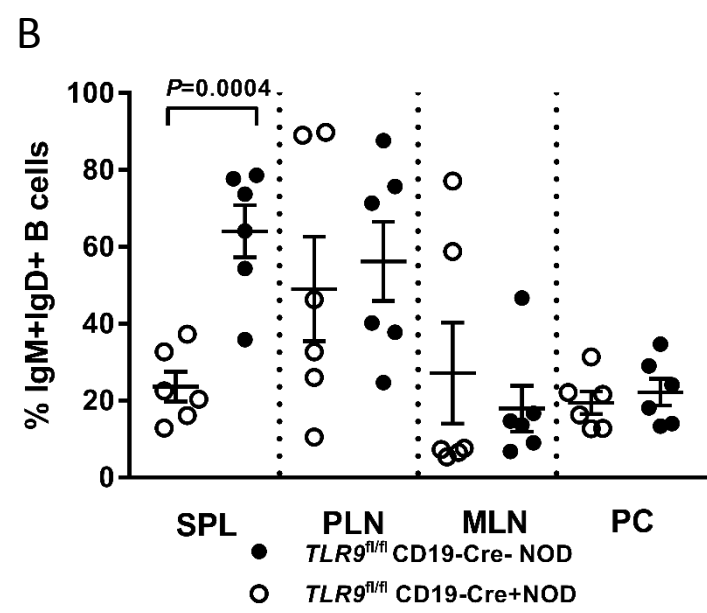

Figure S6

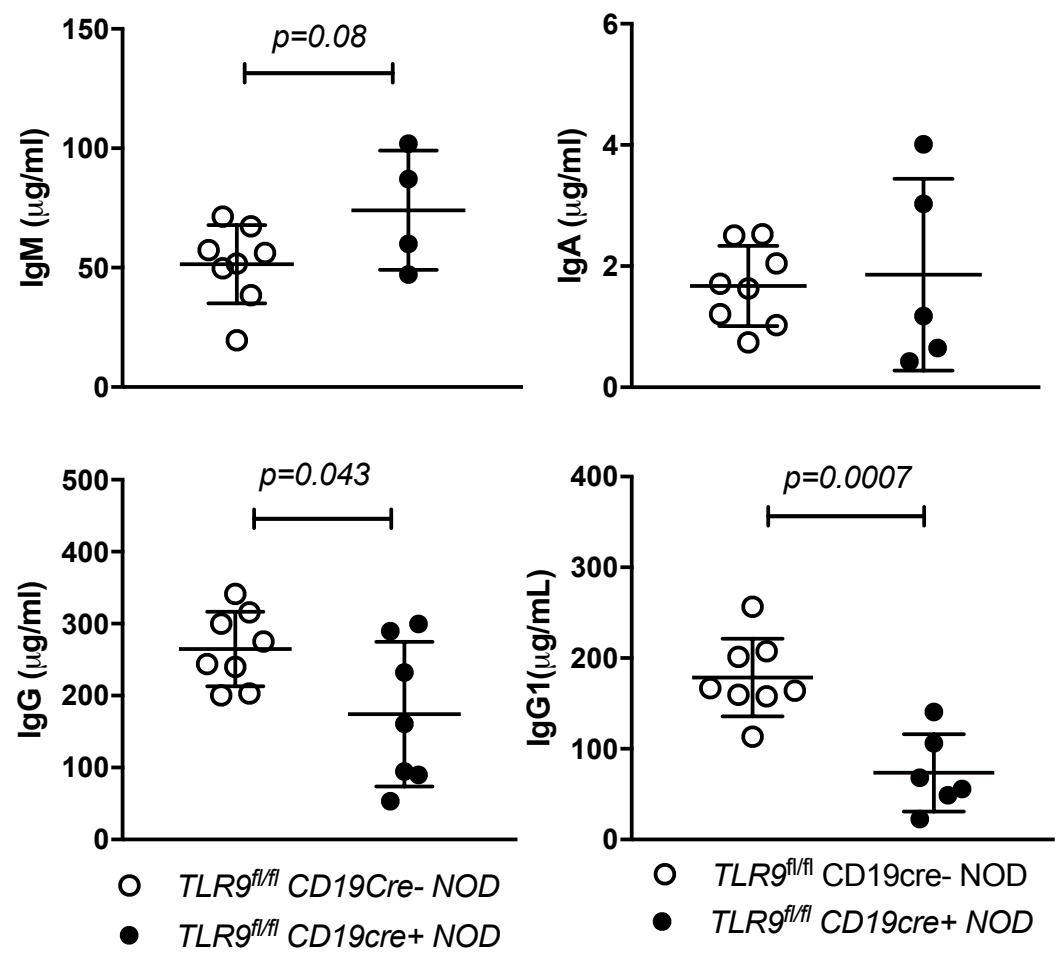

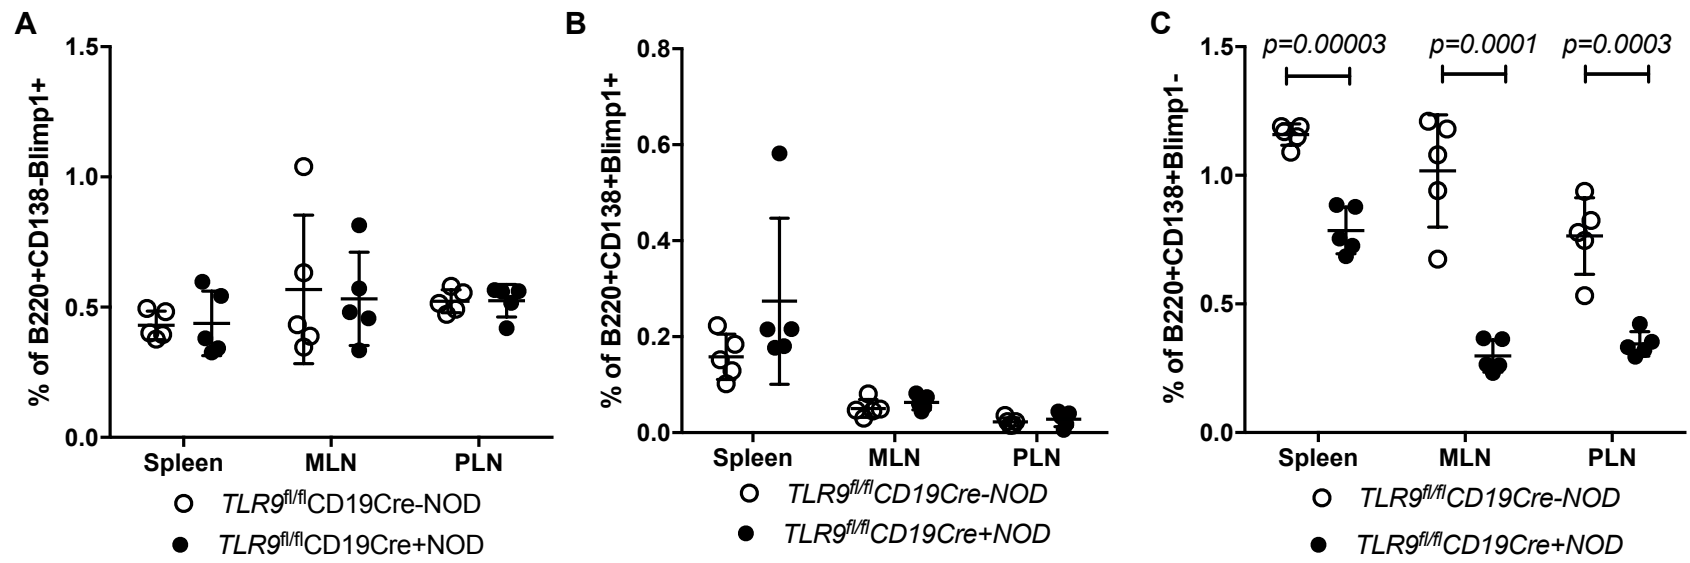

Figure S8

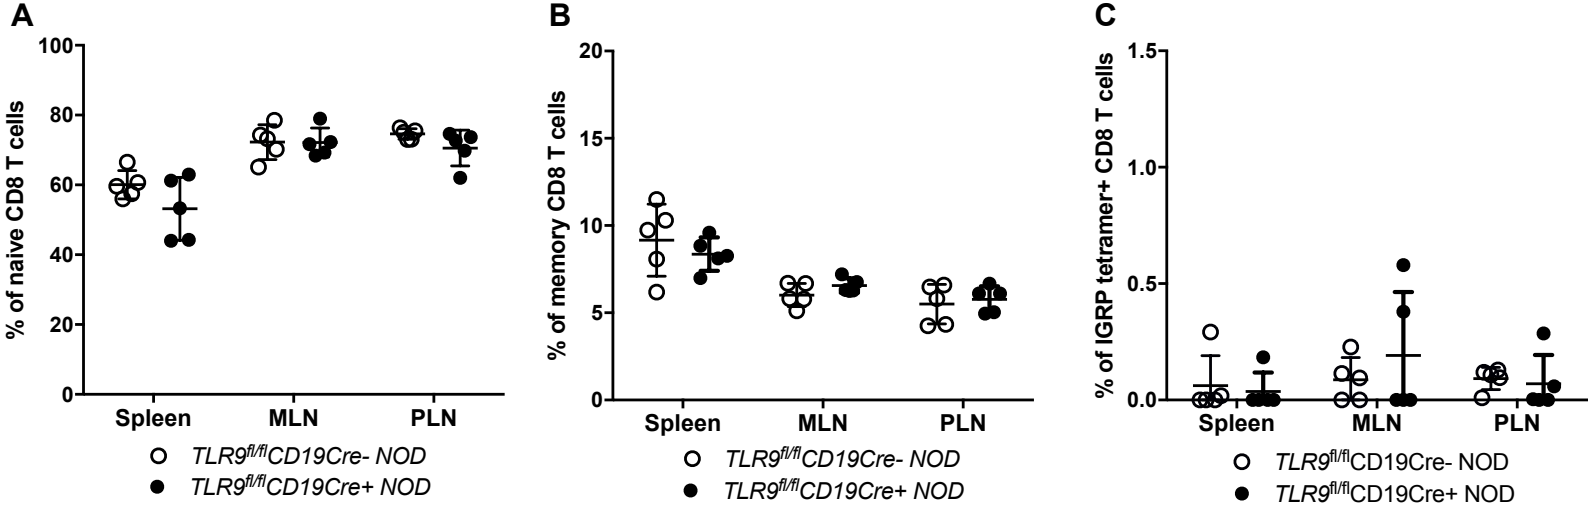



Figure S9

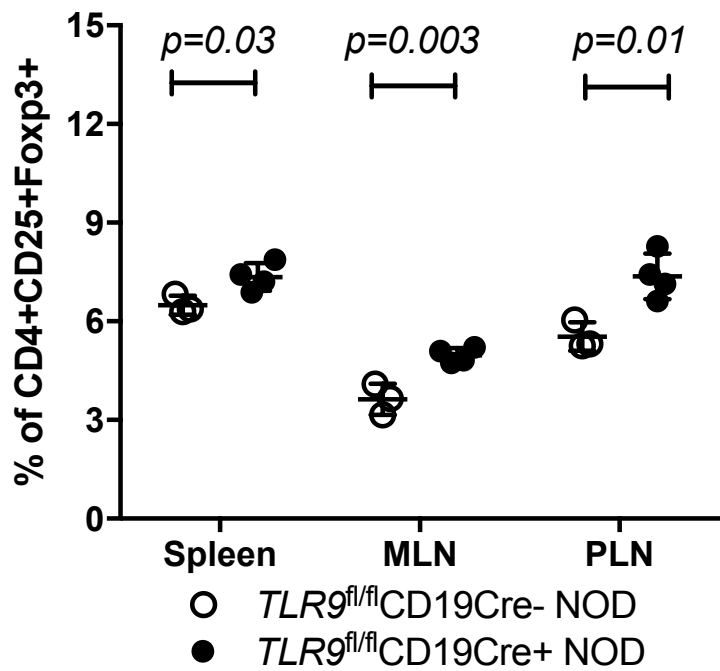

Supplement: Supplementary file 2 [file 1]
